# Supplementary material for: Use of adverse outcome pathways in chemical toxicity testing: potential advantages and limitations
Source: PubMed Central journal article supplement — Environ Health Toxicol. 2017 Dec 30;33(1):e2018002. doi: 10.5620/eht.e2018002 (PMC5903038; doi:10.5620/eht.e2018002), 2017-12-30
Supplement: eht-33-1-e2018002-suppl.pdf [file eht-33-1-e2018002-suppl.pdf]

## Korean Supplementary Text

### Use of adverse outcome pathways in chemical toxicity testing: potential advantages and limitations

#### 화학물질 독성평가에서 독성발현경로 (Adverse Outcome Pathway)의 활용 잠재력 및 한계

Jaeseong Jeong, Jinhee Choi

School of Environmental Engineering, University of Seoul, Seoul, Korea

#### 서론

현대 생활에서 화학제품의 사용이 필수적이 되어감에 따라 전 세계 화학산업은 1970년대 이후 급격하게 성장하였다. 전 세계 화학제품 생산액은 1970년 1,710억 달러에서 2010년 4조 1,200억 달러로 성장하였으며 [1], 2007년 기준 10톤 이상 생산되는 물질이 1만 개 이상일 정도로 화학물질 및 제품의 사용이 증가하고 있다 [2]. 환경으로 유출되는 화학물질로부터 자국의 산업과 국민을 보호하기 위해 유럽연합 (EU, European Union)에서는 2007년부터 '사전 오염예방 원칙'을 근간으로 하는 '화학물질의 등록, 평가, 허가 및 제한 (REACH, Registration, Evaluation, Authorisation & Restriction of Chemicals)' 제도를 시행하고 있다. 국제적으로 EU의 강화된 화학물질 관리 정책을 채택하면서 전 세계적으로 화학물질 독성평가에 대한 요구가 증가하고 있다.

한편, 최근 연구과정에서 희생되는 실험동물에 대한 윤리적인 논란이 계속되어 오고 있다. 2013년 유럽위원회 (EC, European Commission)에서 출판한 실험동물 사용현황 보고서에 따르면 2011년 한 해 동안 실험에서 희생된 동물의 수가 1,150만 마리 이상인 것으로 나타났으며, 특히 설치류의 희생이 큰 것으로 파악되었다 [3]. 이는 연구용 실험동물의 희생을 최소화하자는 동물 대체시험법에 대한 관심으로 이어졌다. 대체시험법은 "3Rs"의 원칙을 기본으로 하고 있는데, 이는 1959년 영국의 동물학자 William M.S. Russell 과 미생물학자 Rex L. Burch 가 "The Principles of Humane Experimental Technique"에서 발표한 원칙이다. 이 원칙은 독성시험에 사용되는 실험동물의 개체수를 저감하고 (Reduction), 부득이 실험동물을 사용하는 경우에는 실험동물에 가해지는 고통 및 스트레스를 줄일 수 있도록 실험 방법을 개선하고 (Refinement), 척추동물을 대신하여 통증을 느끼는 정도가 미약할 것으로 판단되는 하등 동물 또는 QSAR 등 컴퓨터만을 이용하여 독성을 평가하는 *in silico* 방법으로 대체하는 (Replacement) 독성 시험방법을 개발하는 것을 의미한다 [4]. 2013년부터는 유럽 화장품

규정 제 7 차 개정안 (76/768/EEC)을 통해 모든 화장품 원료에 대한 동물 실험을 금지하였고, 유럽에서 동물 실험을 거친 화장품 성분이나 제품을 2013 년부터 시장에 출시하는 것을 전면적으로 금지하였다. 이로 인해 대체시험법에 대한 수요가 급증하고 있다.

이러한 필요성에 따라 2007 년 미국 국립연구위원회 (NRC, National Research Council)에서는 21 세기의 독성 연구에 대한 새로운 비전을 제시한 연구 보고서 “21 세기 독성 시험법의 비전과 전략 (Toxicity Testing in the 21st Century: A Vision and a Strategy)”를 출간하였다. 이 보고서에서는 새롭게 등장한 첨단기술을 기존의 독성평가에 적용하는 방안과 미래 독성평가의 비전을 제시하고 있다. 이 보고서에서는 자동화된 고속대량스크리닝 (HTS, High Throughput Screening) 시스템을 이용한 인체세포의 독성 경로 연구로 고비용, 장시간이 소모되는 동물시험을 대체하고, 독성유전체학, 생물정보학, 시스템생물학, 계산독성학 등 첨단 연구 방법론을 이용한 효율적이고 경제적인 독성평가법을 제안하고 있다 [5]. 이러한 새로운 접근법은 독성 예측에 혁명적인 변화를 일으키고 있으며, 이러한 변화 속에서 분자 수준의 지표를 위해성평가와 같은 환경규제 정책에 활용할 수 있도록 하는 프레임워크인 독성발현경로 (AOP, Adverse Outcome Pathway)가 등장하였다.

### 독성발현경로 (AOP)의 개념 및 개발

#### (1) 독성발현경로의 개념

AOP 는 분자수준의 지표를 위해성평가와 같은 규제 정책에 활용하기 위해 도입된 프레임워크로 분자 수준에서 나타나는 현상으로부터 개체 수준에서 관찰할 수 있는 최종 악영향까지의 기전을 묘사한 생물학적 지도라고 할 수 있다. AOP 는 분자수준초기현상 (MIE, Molecular Initiating Event), 주요현상 (KE, Key Event), 악영향 (AO, Adverse Outcome)으로 구성되어 있다 (Figure 1) [6].

MIE 는 분자 수준에서 화학물질과 생물학적 표적이 상호작용을 일으켜 독성 경로가 시작되는 현상 (DNA 결합, 단백질 산화, 수용체/리간드 상호작용 등)을 말한다. KE 는 순차적인 생물학적 반응 (유전자 활성화, 세포화학의 변화, 조직 발달 등)을 통해 여러 생물학적 수준 (세포, 조직, 장기 등)에 걸쳐 발생하는 현상으로, 주요현상관계 (KER, Key Event Relationship)를 통해 서로 연결되어 있다. AO 는 MIE 와 KE 를 통해 개체 및 개체군 수준에서 나타나는 영향 (사망, 생식 장애, 암, 멸종 등)으로 화학물질 규제 (인체

또는 생태 위해성평가)와 관련되어 있다. AOP 개념을 이용하면, 동일한 MIE/KE 를 통해 작용하는 화학물질 그룹 전체에 대한 독성평가가 가능하다.

### (2) AOP의 개발 및 검증

AOP 의 개발은 *in chemico* 또는 *in vitro* 수준에서 측정된 현상이 *in vivo* 수준에서 관측된 현상과 이어진다는 상향식 접근법으로, (1) 관찰된 최종 AO 를 MIE 와 KE 로부터 설명하는 방법과 (2) 알려진 MIE 와 KE 로부터 AO 를 예측하는 방법으로 이루어질 수 있다. AOP 를 개발하기 위해서는 경로를 시작할 수 있는 화학물질에 대한 구조적 정보나 AO 와 직접적으로 관련된 종말점을 측정하는 *in vivo* 실험 결과 등을 포함하는 정보를 사용할 수 있다. MIE 는 AOP 의 기본적인 단계 및 기초 (Anchor)이므로 명확하게 정의되어야 하며, 주로 수용체 결합이나 단백질 (효소 등) 결합, DNA 결합의 형태로 정의된다. MIE 와 AO 사이에 있는 KE 의 모음을 반응 매트릭스라고 하며, 이것이 많아질수록 AOP 는 복잡해진다. KE 를 확인하기 위해서는 AOP 의 생리학적 경로에 대한 이해가 필수적이며, KE 에 대한 정보는 기존 문헌 검토를 통해 얻을 수 있으므로, 문헌 검토가 AOP 개발에서 매우 중요한 단계이다. KE 가 되기 위해서는 실험적으로 평가할 수 있어야만 하며, 믿을 수 있고, 정해진 AO 와 관련이 있어야 한다. AO 는 세포/조직, 기관, 기관계, 개체, 개체군, 생태계 등 여러 수준에 따라 정의될 수 있다 [6].

AOP 의 개발은 AO 로부터 시작해서 MIE 를 찾아가는 top-down 방식, 잘 알려진 MIE 로부터 시작해서 AO 를 연결하는 bottom-up 방식, 또는 관찰된 생물학적 영향 (KE)으로부터 시작해서 AO 와의 연결을 찾아가는 middle-out 방식 등이 모두 가능하다. AOP 는 또한 자료의 특성에 따라, 잘 연구된 화학물질에서 구축한 AOP 를 다른 화학물질로 일반화하는 사례연구 (case-study) 방법, 특정 모델 동물 또는 분류군에서 구축한 AOP 를 다른 생물에 적용하는 유추 (analogy) 방법, 오믹스 등 고속대량 데이터로부터 KER 을 찾는 데이터마이닝 (data-mining) 방법 등을 통해 개발이 가능하다 [8].

AOP 개발에는 몇 가지 원칙이 있다 [6].

- 1) AOP 는 화학물질 특이적이지 않다. 즉, 일반적으로 AOP 를 구성하는 요소 중 MIE 에서만 화학물질과의 상호작용이 존재하므로 어떤 화학물질이든 MIE 를 일으킨다면 AOP 를 통해 AO 로 연결될 것이라고 가정할 수 있다. 하지만 특정 화학물질의 화학적 특성에만 의존하는 MIE 를 설정할 경우 AOP 의 활용성을 제한할 수 있다.

- 2) AOP 는 모듈로 이루어져 있다. 위해성평가에 활용되기 위해서는 AOP 는 명확하고 쉽게 이해하고 적용할 수 있어야 하며, 유동적이고 광범위한 적용성을 가져야 한다. KE 와 KER 은 생물학적 현상이므로 하나의 AOP 에만 특이적인 것이 아니라 여러 AOP 에 있을 수 있다. 따라서 이러한 KE 와 KER 을 구축한 후, AOP 개발 시 적절한 KE 와 KER 을 가져와 조합함으로써 효율적으로 AOP 를 개발할 수 있다.
- 3) 실제 예측에서는 AOP 네트워크가 기능적 단위이다. 개별 AOP 가 가장 간단한 단위이지만 실제로 하나의 MIE 에만 영향을 주는 화학물질은 드물다. 따라서 실제 독성 영향을 예측하기 위해서는 동일한 KE 와 KER 을 공유하고 있는 여러 AOP 가 연결된 AOP 네트워크를 고려하여야 한다.

이러한 원칙으로 개발된 AOP 는 AOP 의 신뢰성을 평가하기 위해 실험적인 증거를 평가하는 검증 과정을 거친다. AOP 검증은 용량-반응 관계, KE 와 AO 의 연결강도, AO 와 MIE 연결의 강도, 실험적 증거의 생물학적 타당성, 불확실성 등을 고려하여 AOP 의 정성적, 정량적 관계를 분석하는 과정이다. 결국 AOP 의 신뢰성은 생물학적 반응에 대한 기전적 이해와 화학적, 생물학적 시스템 사이의 상호작용의 본질에 대한 포괄적인 이해를 통해 구축된다고 볼 수 있다 [6].

### AOP 개발의 국제적 노력

#### (1) AOP 발전 과정

AOP 개념은 2009 년 미국 오레곤에서 개최된 환경독성화학회 (SETAC, Society of Environmental Toxicology and Chemistry)의 전문가 워크숍인 Pellston 워크숍에서 최초로 정립되었다. 이 워크숍에서 도입된 AOP 는 생태위해성평가의 21 세기 독성시험법 전환을 촉진하는 것을 목적으로 하였다 [9]. 이 워크숍 이후, AOP 프레임워크는 성숙해졌으며, 화학물질 위해성평가에 적용할 수 있는 강력한 접근방법으로 과학계에서 점차 인정받기 시작하였다. 이후 OECD 의 주도로 국제 AOP 개발 프로그램이 시작되어, 2013 년 AOP 의 개발 및 평가에 관한 OECD 최초의 지침서가 발간되었다 [6].

이후 2014 년 이탈리아의 소마에서 열린 워크숍에서 AOP 는 통합독성학 및 화학물질 규제에 적용을 위한 방향으로 발전하게 되었다. 최초에 생태독성 분야로 도입된 AOP 의 개념을 인체독성 분야로 확장하게 되었으며, AOP 의 네트워크 및 혼합물 평가 등의 활용이 논의되었다. 또한 AOP 개발과 활용에서 정부-산업체-학계의 공동 역할의 중요성이 천명되어, AOP 활용의 큰 발전의 계기가 되었다 [10].

이후 2014 년 환경위해성평가를 위한 AOP 사용에서 오믹스 데이터의 잠재적 역할을 논의한 워크숍과 2017 년의 Horizon scanning 접근법을 이용한 AOP 발전을 논의한 SETAC Pellston 워크숍 등 다양한 전문가 워크숍을 통해 AOP 분야는 짧은 기간 큰 발전을 이루고 있다.

### (2) OECD 중심의 AOP 개발

2012 년 피부과민성평가의 AOP 인 ‘Adverse Outcome Pathway (AOP) for Skin Sensitisation Initiated by Covalent Binding to Proteins’에 대한 OECD 보고서가 처음으로 작성된 후, OECD 는 AOP 연구를 주도하며 AOP 개발 촉진을 위한 문헌을 지속적으로 출판하고 있다 (Table 1). 2013 년에는 AOP 의 개발 및 평가에 관한 최초의 OECD 지침서 초안이 발간되었다. 이 지침서에는 AOP 를 확인하고 문서화하는데 필요한 정보와 AOP 평가를 수행하는 방법 등 AOP 에 대한 기본 지식이 소개되어 있다. 2016 년에는 그 동안의 피드백을 반영한 지침서 보충물 (supplement)과 OECD 에서 검증이 완료된 AOP 에 대한 보고서가 출판되었다.

2018 년 3 월에 갱신된 OECD AOP 개발 프로그램 작업계획 (AOP development programme workplan)에는 AOP 개발 부문에 56 개, AOP 개발 및 평가를 위한 지침서 부문에 1 개, 지식관리도구 부문에 3 개, 기타 부문에 1 개의 프로젝트가 등록되어 수행 중이다 [11].

### (3) AOP Knowledge Base

OECD 가 주도하고 있는 AOP 연구 개발 분야 중 가장 중요한 활동 중 하나가 AOP 지식기반 (AOP-KB, AOP Knowledge Base)의 구축이다. 2014 년 OECD 에서는 기존에 존재하는 지식의 수집을 용이하게 함으로써 AOP 개발을 더욱 촉진하기 위해서 대체동물시험법 유럽표준연구소 (EURL ECVAM, European Union Reference Laboratory for alternatives to animal testing), 미국 환경청 (US EPA, United States Environmental Protection Agency)과 함께 AOP-KB 를 구축하였다. AOP-KB 는 독성 연구에서 영향 데이터를 수집하고, KE 사이의 정량적 관계를 생성하기 위해 데이터를 조합하는 플랫폼이다. AOP-KB 구축의 궁극적인 목표는 국제적 표준에 따라 AOP 를 보급하기 위해서 이용 가능한 자원을 포괄적으로 수집하는 것이다.

AOP-KB (<http://aopkb.oecd.org>)는 AOP Wiki, Effectopedia, Intermediate Effects DB, AOP Explorer 로 구성되어 있으며 (Figure 2), e.AOP.Portal

(<http://aopkb.org/search.ashx>)을 통해서 등록된 AOP 를 검색할 수 있도록 하였다. 현재 AOP Wiki 가 정식 운영 중에 있으며, Effectopedia 는 beta 버전이 공개되어 있고, Intermediate Effects DB 와 AOP Xplorer 는 개발 초기단계이다.

AOP Wiki (<https://aopwiki.org>)는 2014 년 OECD, EU, US EPA 등이 협력하여 제작하였다. AOP Wiki 는 연구자 간 협업을 장려하고 AOP 개발 노력을 극대화하기 위한 수단으로, 위해성평가에 필요한 AOP 정보의 일관적이고 효율적인 공동 수집을 위한 오픈소스 웹 기반 도구이다. 편리한 위키 (Wiki) 기반 인터페이스를 이용하여 기존에 존재하는 지식이나 출판된 연구의 정보를 사용자가 손쉽게 AOP 로 가져올 수 있도록 하였으며, 등록된 AOP 에 대한 자유로운 의견 교환이 가능하도록 하였다.

OECD 의 AOP 개발 프로그램은 OECD EAGMST (Extended Advisory Group on Molecular Screening and Toxicogenomics)에서 관리하고 있으며, AOP Wiki 는 OECD EAGMST 와 SAAOP (Society for the Advancement of Adverse Outcome Pathways)에서 관리하고 있다. SAAOP 는 AOP Wiki 에 등록된 AOP 가 OECD 에서 출판한 AOP 지침 및 안내서와 일관성을 유지할 수 있도록 조율하는 기구이다. AOP Wiki 에 AOP 가 등록되면, SAAOP 와 EAGMST 검토를 통해 AOP 가 보완되고 EAGMST 에서 최종 승인한 AOP 는 OECD 의 WNT (Working Group of National Coordinators of the Test Guidelines Programme)와 TFHA (Task Force for Hazard Assessment)의 검토를 거치게 된다 (Figure 3)[12].

AOP Wiki 에는 2018 년 3 월 현재 총 212 개의 AOP 가 등록되어 있고 평가 중인 AOP 가 27 개, 개발 중인 AOP 가 185 개이며, 실시간으로 업데이트되고 있다. 생태독성에 대한 AOP 가 76 개, 인체독성에 대한 AOP 가 135 개, 기타 1 개로 최근에는 인체에 대한 AOP 개발이 더 활발하게 진행되고 있다 (Table 2).

Effectopedia (<https://www.effectopedia.org>)는 정량적 AOP 를 설명하기 위한 공개적인 지식 수집 및 공동 작업 도구이다. 2006 년 International QSAR Foundation 에서 *in vivo* 위해성 예측에 대한 구조적정량활성관계 (QSAR, Quantitative Structure - Activity Relationships)의 기술 장벽을 극복하기 위해 창안되었다. 유럽위원회 (EC, European Commission)의 지원을 받아 OECD 에서 개발 중에 있으며, 현재 총 20 개의 AOP 가 등록되어 있다. 신규 AOP 를 개발하는 사용자는 화학물질, MIE, KE, KER, AO 등 AOP 를 구성하는 모든 요소를 손쉽게 추가할 수 있으며, 각 구성요소에 대한 실험데이터를 입력하면 구성요소간 관계를 정량적으로 분석할 수 있다. AOP 내 모든

인과관계를 시각적으로 묘사하는 그래픽 편집기인 Effectopedia 는 정량적 AOP 를 개발하고 모델링하는 플랫폼의 역할을 한다[13].

### 화학물질 관리에서 AOP 의 활용 잠재력

여러 생물학적 수준에서 정확하게 기술된 AOP 는 다양한 목적으로 사용될 수 있는 기전 정보를 제공할 수 있다. 특정 주요 현상이 과학적으로 확인되면, 그 현상을 직접적으로 분석할 수 있는 *in vitro* 와 *ex vivo* 분석법의 개발을 촉진하므로 OECD Test Guideline Programme 에 기여할 수 있으며, 이러한 분석법을 연결하면 규제적 목적으로 사용할 수 있는 시험법이 설립될 수 있다. AOP 를 통해 동일한 MIE 를 통해 작용하는 화학물질 그룹 전체에 대한 독성평가가 가능해지며, 화학물질 카테고리화 구조활성관계 수립 및 최소한의 실험으로 최대한의 유용한 정보를 얻을 수 있는 실험 전략 개발 등에 활용될 수 있다. 종 특이성이 없는 KE 를 포함하는 AOP 는 광범위한 분류군 (척추동물 / 무척추동물) 전반에 적용될 수 있으므로, 독성 기전에 기반한 여러 종의 화학물질 위해성평가가 가능하게 될 것이다 [14].

### 결론

분자수준의 지표를 화학물질의 위해성평가에 활용하기 위해 개발된 프레임워크인 AOP 의 개념이 화학물질 관리에 사용된다면, 위해성평가에서 비동물 대체시험법의 활용이 증가하여 전통적인 동물실험의 의존도를 크게 줄일 수 있을 것이다. 이는 상위수준 지표 (apical endpoint)에 기반한 기존의 화학물질 관리 패러다임을 *in silico* 와 *in vitro* 데이터를 적극적으로 사용하는 방향으로 전환시키는 계기가 될 것이며, 궁극적으로는 이를 통해 보다 효과적인 화학물질 관리의 패러다임 전환이 이루어질 것으로 기대된다.

### 사사

본 연구는 한국환경산업기술원의 생활공감 환경보건기술개발사업 (2017001370001)의 연구비 지원에 의해 수행되었음.

### 참고문헌

1. UNEP. Global Chemicals Outlook - Towards Sound Management of Chemicals: 2013. p. 11-14.

## **Environmental Health and Toxicology**

2. Innovest Strategic Value Advisors. Overview of the Chemicals Industry; 2007. p. 28.
3. EC. Seventh Report on the Statistics on the Number of Animals used for Experimental and other Scientific Purposes in the Member States of the European Union; 2013. p. 2-5.
4. Liebsch B, Grune B, Seiler A, Butzke D, Oelgeschläger M, Pirow R et al. Alternatives to animal testing: current status and future perspectives. Arch Toxicol 2011;85:841-858.
5. Gibb S. Toxicity testing in the 21st century: A vision and a strategy. Reprod Toxicol 2008;25(1):136-138.
6. OECD. Guidance Document on developing and assessing Adverse Outcome Pathways; 2013. p. 9-20.
7. Ankley G, Bennett R, Erickson R, Hoff D, Hornung M, Johnson R et al. Adverse outcome pathways: A conceptual framework to support ecotoxicology research and risk assessment. Environ Toxicol Chem 2010; 29: 730-741.
8. Villeneuve D, Crump D, Garcia-Reyero N, Hecker M, Hutchinson T, LaLone C et al. Adverse outcome pathway (AOP) development I: strategies and principles. Toxicol Sci 2014; 142(2): 312-320.
9. Villeneuve D and Garcia-Reyero N. Vision & strategy: Predictive ecotoxicology in the 21st century. Environ Toxicol Chem 2011; 30: 1-8.
10. Garcia-Reyero N. Are Adverse Outcome Pathways Here to Stay? Environ Sci Technol 2015; 49(1): 3-9.
11. OECD. AOP development programme workplan [cited 2017 Jun 20]. Available from: <http://www.oecd.org/chemicalsafety/testing/projects-adverse-outcome-pathways.htm>.
12. Organisation for Economic Cooperation and Development. Adverse Outcome Pathways, Molecular Screening and Toxicogenomics [cited 2017 Jun 20]. Available from: <http://www.oecd.org/chemicalsafety/testing/adverse-outcome-pathways-molecular-screening-and-toxicogenomics.htm>.



## Environmental Health and Toxicology

13. Hristo Aladjov. Effectopedia - open research platform for AOP knowledge integration and use. OpenTox Euro 2015. Session 7: Effectopedia Knowledge Integration.
14. Kramer V, Etterson M, Hecker M, Murphy C, Roesijadi G, Spade D et al. Adverse outcome pathways and ecological risk assessment: bridging to population-level effects. Environ Toxicol Chem 2011; 30: 64-76.

### 표와 그림

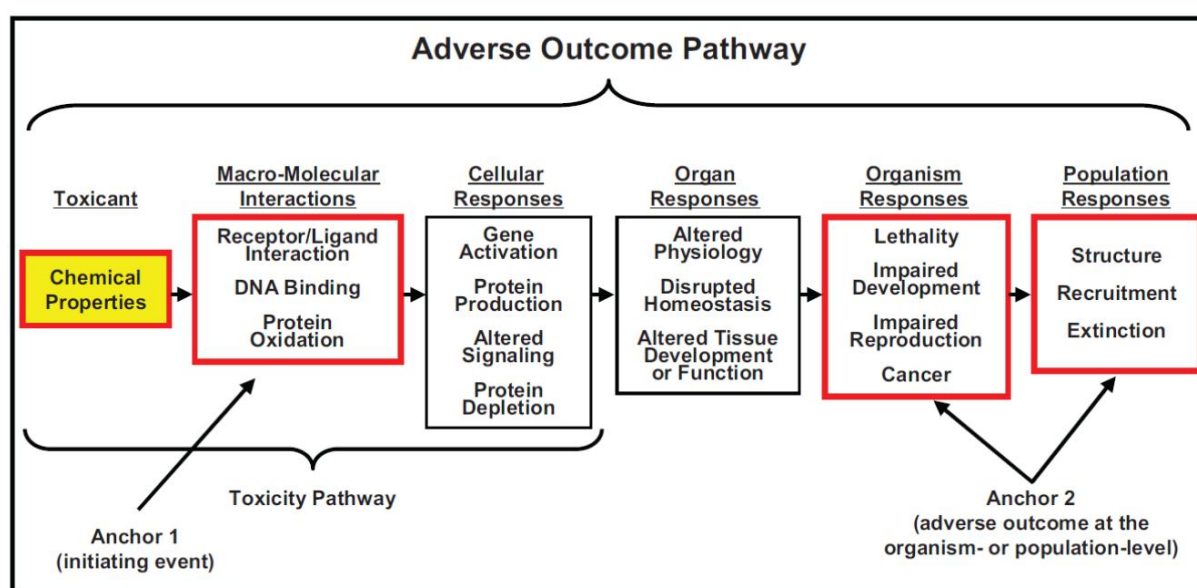

**Figure 1.** Adverse outcome pathways (AOPs) framework. From Ankley GT et al. Environ Toxicol Chem 2010;29(3):730-741 [7].

**Table 1.** AOP-related documents published by the OECD

| Category                         | Year | Title                                                                                                                                   |
|----------------------------------|------|-----------------------------------------------------------------------------------------------------------------------------------------|
| Series on Testing and Assessment | 2012 | The Adverse Outcome Pathway for Skin Sensitisation Initiated by Covalent Binding to Proteins (series on Testing and Assessment No. 168) |
|                                  | 2013 | Guidance Document on developing and assessing Adverse Outcome Pathways (series on Testing and Assessment No. 184)                       |
| Series on                        | 2016 | Users' Handbook supplement to the Guidance Document for                                                                                 |

|                          |      |                                                                                                                                                                                                                                                             |
|--------------------------|------|-------------------------------------------------------------------------------------------------------------------------------------------------------------------------------------------------------------------------------------------------------------|
| Adverse Outcome Pathways |      | developing and assessing Adverse Outcome Pathways (OECD Series on Adverse Outcome Pathways No. 1)                                                                                                                                                           |
|                          | 2016 | Adverse Outcome Pathway on Protein Alkylation Leading to Liver Fibrosis (OECD Series on Adverse Outcome Pathways No. 2)                                                                                                                                     |
|                          | 2016 | Adverse Outcome Pathway on Alkylation of DNA in Male Pre-Meiotic Germ Cells Leading to Heritable Mutations (OECD Series on Adverse Outcome Pathways No. 3)                                                                                                  |
|                          | 2016 | Adverse Outcome Pathway on Aromatase Inhibition Leading to Reproductive Dysfunction (in Fish) (OECD Series on Adverse Outcome Pathways No. 4)                                                                                                               |
|                          | 2016 | Adverse Outcome Pathway on chronic binding of antagonist to N-methyl-D-aspartate receptors (NMDARs) during brain development induces impairment of learning and memory abilities (OECD Series on Adverse Outcome Pathways No. 5)                            |
|                          | 2016 | Adverse Outcome Pathway on binding of agonists to ionotropic glutamate receptors in adult brain leading to excitotoxicity that mediates neuronal cell death, contributing to learning and memory impairment (OECD Series on Adverse Outcome Pathways No. 6) |

AOP, adverse outcome pathway; OECD, Organization for Economic Cooperation and Development.

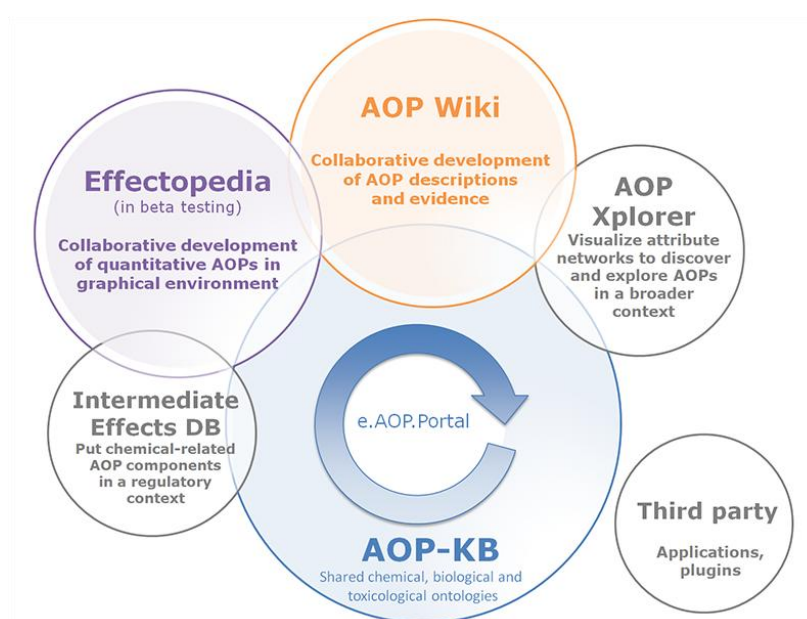

Figure 2. AOP-KB (<https://aopkb.oecd.org/>). AOP, adverse outcome pathway; KB, knowledge

base.

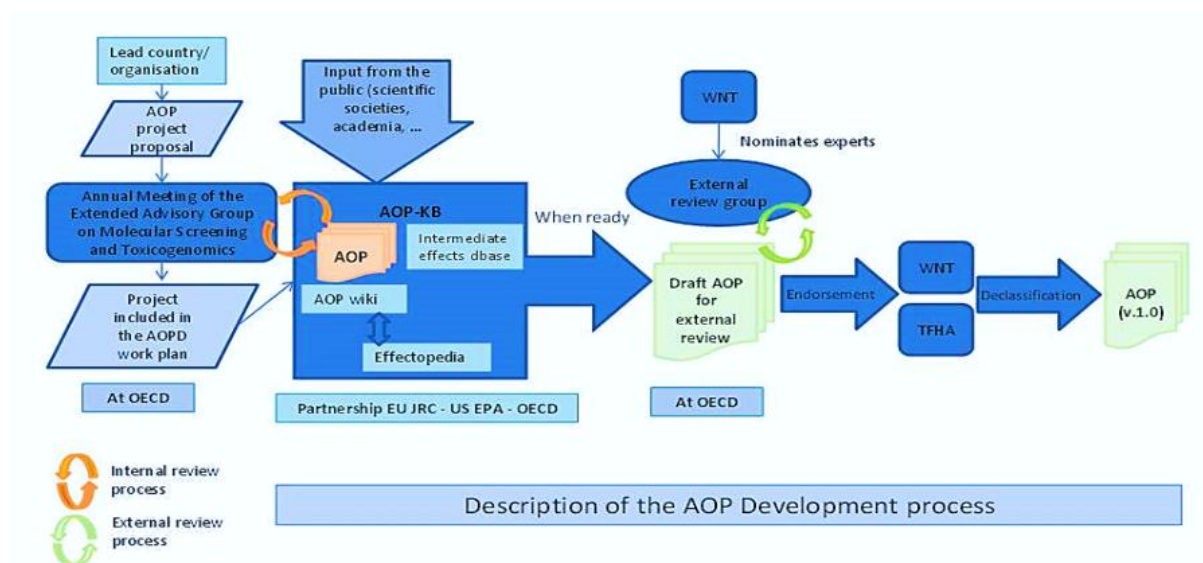

**Figure 3.** OECD AOP development process [12]. OECD, Organization for Economic Cooperation and Development; AOPD, Adverse Outcome Pathway Development; EU, European Union; JRC, Joint Research Centre; EPA, Environmental Protection Agency; AOP, Adverse Outcome Pathway; KB, Knowledge Base; WNT, Working Group of the National Coordinators of the Test Guidelines Programme; TFHA, Task Force on Hazard Assessment.

**Table 2.** Status of AOPs in AOP Wiki list

| Status                           | Number | OECD Program |
|----------------------------------|--------|--------------|
| <b>AOPs Ready for Commenting</b> |        |              |
| TFHA/WNT Endorsed                | 6      | Included     |
| EAGMST Approved                  | 3      |              |
| EAGMST Under Review              | 18     |              |
| <b>AOPs Under Development</b>    |        |              |
| EAGMST Under Development         | 27     | Not included |
| SAAOP Under Development          | 149    |              |
| Recent AOP                       | 9      |              |

AOP Wiki (<https://aopwiki.org/>) 2018.03.

AOP, adverse outcome pathway; TFHA, Task Force for Hazard Assessment; WNT, Working Group of the National Coordinators of the Test Guidelines Programme; EAGMST, Extended Advisory Group on Molecular Screening and Toxicogenomics; SAAOP, Society for the

Advancement of Adverse Outcome Pathways.
